# Supplementary material for: Genetic variation in four maturity genes affects photoperiod insensitivity and PHYA-regulated post-flowering responses of soybean
Source: PubMed Central journal article supplement (PMC3698206; doi:10.1186/1471-2229-13-91), 2013-06-25
Supplement: 1471-2229-13-91-S1.pdf [file 1471-2229-13-91-S1.pdf]

Additional file 1. Genotypes at four maturity and a determinate growth habit loci for 53 early-maturing photoperiod-insensitive soybean accessions of different origins

| Accession              | Origin           | Genotype         |           |                  |                  |                   |
|------------------------|------------------|------------------|-----------|------------------|------------------|-------------------|
|                        |                  | <i>E1</i>        | <i>E2</i> | <i>E3</i>        | <i>E4</i>        | <i>Dt1</i>        |
| Harosoy-e3e4           |                  | <i>e1-as</i>     | <i>e2</i> | <i>e3-tr</i>     | <i>e4-SORE1</i>  | <i>Dt1</i>        |
| Harosoy-e3             |                  | <i>e1-as</i>     | <i>e2</i> | <i>e3-tr</i>     | <b><i>E4</i></b> | <i>Dt1</i>        |
| Harosoy-e4             |                  | <i>e1-as</i>     | <i>e2</i> | <b><i>E3</i></b> | <i>e4-SORE1</i>  | <i>Dt1</i>        |
| Harosoy                |                  | <i>e1-as</i>     | <i>e2</i> | <b><i>E3</i></b> | <b><i>E4</i></b> | <i>Dt1</i>        |
| Gokuwase Kamishunbetsu | Hokkaido/Japan   | <b><i>E1</i></b> | <i>e2</i> | <i>e3-tr</i>     | <i>e4-SORE1</i>  | <i>dt1-bb</i>     |
| Kamaishi 17            | Tohoku/Japan     | <b><i>E1</i></b> | <i>e2</i> | <i>e3-tr</i>     | <i>e4-kam</i>    | <i>dt1-bb</i>     |
| Keshuang               | North-east China | <b><i>E1</i></b> | <i>e2</i> | <i>e3-tr</i>     | <i>e4-kes</i>    | <b><i>Dt1</i></b> |
| Miharudaizu            | Hokkaido/JPN     | <b><i>E1</i></b> | <i>e2</i> | <i>e3-tr</i>     | <i>e4-SORE1</i>  | <i>dt1-bb</i>     |
| Ohfunato 45            | Tohoku/Japan     | <b><i>E1</i></b> | <i>e2</i> | <i>e3-tr</i>     | <i>e4-kam</i>    | <i>dt1-bb</i>     |
| Ohyachi 2              | Hokkaido/Japan   | <b><i>E1</i></b> | <i>e2</i> | <i>e3-tr</i>     | <i>e4-SORE1</i>  | <i>dt1-bb</i>     |
| Okuhara 1              | Hokkaido/Japan   | <b><i>E1</i></b> | <i>e2</i> | <i>e3-tr</i>     | <i>e4-SORE1</i>  | <i>dt1-bb</i>     |
| Otome wase             | Tohoku/Japan     | <b><i>E1</i></b> | <i>e2</i> | <i>e3-tr</i>     | <i>e4-oto</i>    | <i>dt1-bb</i>     |
| Darta                  | Poland           | <i>e1-as</i>     | <i>e2</i> | <i>e3-fs</i>     | <i>e4-SORE1</i>  | <i>dt1-tb</i>     |
| Dongda 1               | North-east China | <i>e1-as</i>     | <i>e2</i> | <i>e3-fs</i>     | <i>e4-kes</i>    | <b><i>Dt1</i></b> |
| Heihe 12               | North-east China | <i>e1-as</i>     | <i>e2</i> | <i>e3-tr</i>     | <i>e4-SORE1</i>  | <b><i>Dt1</i></b> |
| Heihe 13               | North-east China | <i>e1-as</i>     | <i>e2</i> | <i>e3-fs</i>     | <i>e4-kes</i>    | <b><i>Dt1</i></b> |
| Heihe 21               | North-east China | <i>e1-as</i>     | <i>e2</i> | <i>e3-tr</i>     | <i>e4-SORE1</i>  | <b><i>Dt1</i></b> |
| Heihe 33               | North-east China | <i>e1-as</i>     | <i>e2</i> | <i>e3-tr</i>     | <i>e4-kes</i>    | <b><i>Dt1</i></b> |
| Heihe 35               | North-east China | <i>e1-as</i>     | <i>e2</i> | <i>e3-fs</i>     | <i>e4-kes</i>    | <b><i>Dt1</i></b> |
| Heihe 40               | North-east China | <i>e1-as</i>     | <i>e2</i> | <i>e3-fs</i>     | <i>e4-kes</i>    | <b><i>Dt1</i></b> |
| Heihe 41               | North-east China | <i>e1-as</i>     | <i>e2</i> | <i>e3-fs</i>     | <i>e4-kes</i>    | <b><i>Dt1</i></b> |
| Jiagedaqi 04           | North-east China | <i>e1-as</i>     | <i>e2</i> | <i>e3-fs</i>     | <i>e4-SORE1</i>  | <b><i>Dt1</i></b> |
| Jiagedaqi 05           | North-east China | <i>e1-as</i>     | <i>e2</i> | <i>e3-fs</i>     | <i>e4-SORE1</i>  | <b><i>Dt1</i></b> |
| Jiagedaqi 08           | North-east China | <i>e1-as</i>     | <i>e2</i> | <i>e3-tr</i>     | <i>e4-SORE1</i>  | <b><i>Dt1</i></b> |
| Jiagedaqi 11           | North-east China | <i>e1-as</i>     | <i>e2</i> | <i>e3-tr</i>     | <i>e4-SORE1</i>  | <b><i>Dt1</i></b> |
| Jiagedaqi 12           | North-east China | <i>e1-as</i>     | <i>e2</i> | <i>e3-tr</i>     | <i>e4-SORE1</i>  | <b><i>Dt1</i></b> |
| Jiagedaqi 14           | North-east China | <i>e1-as</i>     | <i>e2</i> | <i>e3-tr</i>     | <i>e4-SORE1</i>  | <b><i>Dt1</i></b> |
| Jiagedaqi 16           | North-east China | <i>e1-as</i>     | <i>e2</i> | <i>e3-tr</i>     | <i>e4-kes</i>    | <b><i>Dt1</i></b> |
| Jiagedaqi 17           | North-east China | <i>e1-as</i>     | <i>e2</i> | <i>e3-fs</i>     | <i>e4-kes</i>    | <b><i>Dt1</i></b> |
| Jiagedaqi 18           | North-east China | <i>e1-as</i>     | <i>e2</i> | <i>e3-fs</i>     | <i>e4-kes</i>    | <b><i>Dt1</i></b> |
| Jiagedaqi 19           | North-east China | <i>e1-as</i>     | <i>e2</i> | <i>e3-tr</i>     | <i>e4-kes</i>    | <b><i>Dt1</i></b> |
| Kiev 242 WH            | Ukraine          | <i>e1-as</i>     | <i>e2</i> | <i>e3-tr</i>     | <i>e4-SORE1</i>  | <i>dt1-tb</i>     |
| Nawiko                 | Poland           | <i>e1-as</i>     | <i>e2</i> | <i>e3-ns</i>     | <i>e4-SORE1</i>  | <i>dt1-tb</i>     |
| Oktyabr-70             | Far-east Russia  | <i>e1-as</i>     | <i>e2</i> | <i>e3-fs</i>     | <i>e4-kes</i>    | <b><i>Dt1</i></b> |
| Sadovy                 | Far-east Russia  | <i>e1-as</i>     | <i>e2</i> | <i>e3-fs</i>     | <i>e4-kes</i>    | <b><i>Dt1</i></b> |
| Vega                   | Far-east Russia  | <i>e1-as</i>     | <i>e2</i> | <i>e3-fs</i>     | <i>e4-kes</i>    | <b><i>Dt1</i></b> |
| Yug 30                 | Ukraine          | <i>e1-as</i>     | <i>e2</i> | <i>e3-tr</i>     | <i>e4-SORE1</i>  | <b><i>Dt1</i></b> |
| Zeya 2                 | Far-east Russia  | <i>e1-as</i>     | <i>e2</i> | <i>e3-tr</i>     | <i>e4-kes</i>    | <b><i>Dt1</i></b> |
| Heihe 34               | North-east China | <i>e1-as</i>     | <i>e2</i> | <i>e3-tr</i>     | <b><i>E4</i></b> | <b><i>Dt1</i></b> |
| Jiagedaqi 02           | North-east China | <i>e1-as</i>     | <i>e2</i> | <i>e3-tr</i>     | <b><i>E4</i></b> | <b><i>Dt1</i></b> |
| Jiagedaqi 20           | North-east China | <i>e1-as</i>     | <i>e2</i> | <i>e3-tr</i>     | <b><i>E4</i></b> | <b><i>Dt1</i></b> |
| Dya-1                  | Far-east Russia  | <i>e1-as</i>     | <i>e2</i> | <i>e3-fs</i>     | <b><i>E4</i></b> | <b><i>Dt1</i></b> |
| Sonata                 | Far-east Russia  | <i>e1-as</i>     | <i>e2</i> | <i>e3-fs</i>     | <b><i>E4</i></b> | <b><i>Dt1</i></b> |
| Yubileynaya            | Far-east Russia  | <i>e1-as</i>     | <i>e2</i> | <i>e3-fs</i>     | <b><i>E4</i></b> | <b><i>Dt1</i></b> |
| Zeika                  | Far-east Russia  | <i>e1-as</i>     | <i>e2</i> | <i>e3-fs</i>     | <b><i>E4</i></b> | <b><i>Dt1</i></b> |
| Gai                    | Poland           | <i>e1-nl</i>     | <i>e2</i> | <i>e3-tr</i>     | <i>e4-SORE1</i>  | <b><i>Dt1</i></b> |
| Karafuto 1             | Hokkaido/Japan   | <i>e1-nl</i>     | <i>e2</i> | <i>e3-tr</i>     | <i>e4-SORE1</i>  | <i>dt1-bb</i>     |
| Dongda 2               | North-east China | <i>e1-nl</i>     | <i>e2</i> | <i>e3-tr</i>     | <b><i>E4</i></b> | <b><i>Dt1</i></b> |
| Heihe 28               | North-east China | <i>e1-nl</i>     | <i>e2</i> | <i>e3-tr</i>     | <b><i>E4</i></b> | <b><i>Dt1</i></b> |
| Jiagedaqi 01           | North-east China | <i>e1-nl</i>     | <i>e2</i> | <i>e3-tr</i>     | <b><i>E4</i></b> | <b><i>Dt1</i></b> |
| Jiagedaqi 03           | North-east China | <i>e1-nl</i>     | <i>e2</i> | <i>e3-tr</i>     | <b><i>E4</i></b> | <b><i>Dt1</i></b> |
| Jiagedaqi 09           | North-east China | <i>e1-nl</i>     | <i>e2</i> | <i>e3-tr</i>     | <b><i>E4</i></b> | <b><i>Dt1</i></b> |
| Jiagedaqi 10           | North-east China | <i>e1-nl</i>     | <i>e2</i> | <i>e3-tr</i>     | <b><i>E4</i></b> | <b><i>Dt1</i></b> |
| Jiagedaqi 13           | North-east China | <i>e1-nl</i>     | <i>e2</i> | <i>e3-tr</i>     | <b><i>E4</i></b> | <b><i>Dt1</i></b> |
| Sakamotowase           | Hokkaido/Japan   | <i>e1-fs</i>     | <i>e2</i> | <i>e3-tr</i>     | <b><i>E4</i></b> | <i>dt1-bb</i>     |
| Kiev 242 BH            | Ukraine          | <i>e1-nl</i>     | <i>e2</i> | <b><i>E3</i></b> | <i>e4-SORE1</i>  | <b><i>Dt1</i></b> |
| Ustya                  | Ukraine          | <i>e1-nl</i>     | <i>e2</i> | <b><i>E3</i></b> | <i>e4-SORE1</i>  | <b><i>Dt1</i></b> |
